# Supplementary material for: Effect of combined treatment with alendronate and calcitriol on femoral neck strength in osteopenic rats
Source: Springer Nature journal article supplement (doi:10.1186/1749-799x-3-51), 2008-12-01
Supplement: Additional file 1 [file 1749-799x-3-51-s1.pdf]

### Relation between bone mass parameters and fracture load at the femoral neck

| Parameters              | All groups               |              | Alendronate-treated groups<br>(ALN and ALN + Vit.D) |              | Vitamin D <sub>3</sub> -treated groups<br>(Vit.D and ALN + Vit.D) |              | Combined treatment group<br>(ALN + Vit.D) |              |
|-------------------------|--------------------------|--------------|-----------------------------------------------------|--------------|-------------------------------------------------------------------|--------------|-------------------------------------------|--------------|
|                         | Correlation              | Significance | Correlation                                         | Significance | Correlation                                                       | Significance | Correlation                               | Significance |
|                         | coefficient ( <i>r</i> ) | ( <i>p</i> ) | coefficient ( <i>r</i> )                            | ( <i>p</i> ) | coefficient ( <i>r</i> )                                          | ( <i>p</i> ) | coefficient ( <i>r</i> )                  | ( <i>p</i> ) |
| Total BMC               | 0.509                    | 0.004        | 0.616                                               | 0.033        | 0.596                                                             | 0.043        | 0.825                                     | 0.043        |
| Total BMD               | 0.336                    | 0.070        | 0.554                                               | 0.061        | 0.510                                                             | 0.086        | 0.210                                     | 0.704        |
| Cortical BMC            | 0.492                    | 0.006        | 0.665                                               | 0.018        | 0.588                                                             | 0.048        | 0.743                                     | 0.091        |
| Cortical BMD            | 0.308                    | 0.098        | 0.550                                               | 0.064        | 0.492                                                             | 0.092        | 0.183                                     | 0.729        |
| Cancellous BMC          | 0.351                    | 0.058        | 0.393                                               | 0.207        | 0.171                                                             | 0.595        | 0.421                                     | 0.405        |
| Cancellous BMD          | 0.259                    | 0.166        | 0.436                                               | 0.110        | 0.236                                                             | 0.459        | 0.758                                     | 0.081        |
| Cortical bone thickness | 0.063                    | 0.740        | 0.041                                               | 0.899        | 0.024                                                             | 0.940        | 0.050                                     | 0.925        |
| Total bone area         | 0.487                    | 0.006        | 0.691                                               | 0.013        | 0.610                                                             | 0.039        | 0.598                                     | 0.210        |
